# Supplementary material
Source: PubMed Central journal article supplement (PMC4415608)
Supplement: NIHMS679797-supplement-1.pdf [file NIHMS679797-supplement-1.pdf]

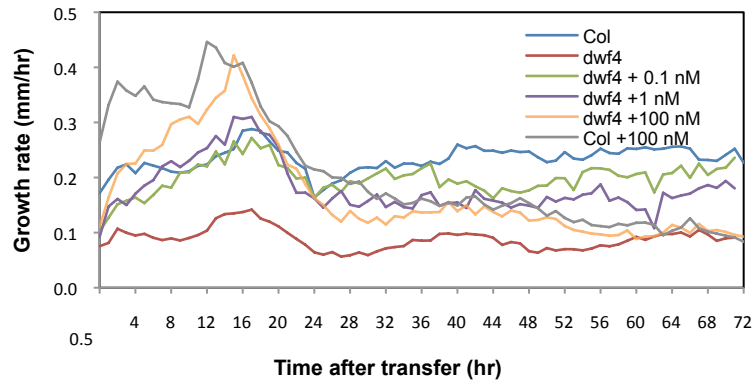

**Figure S1. Brassinosteroid regulates dynamics of root growth.**

Quantification of growth rates of wild-type and *dwf4* roots transferred to media with various concentrations of BL or mock. See also Figure 1.

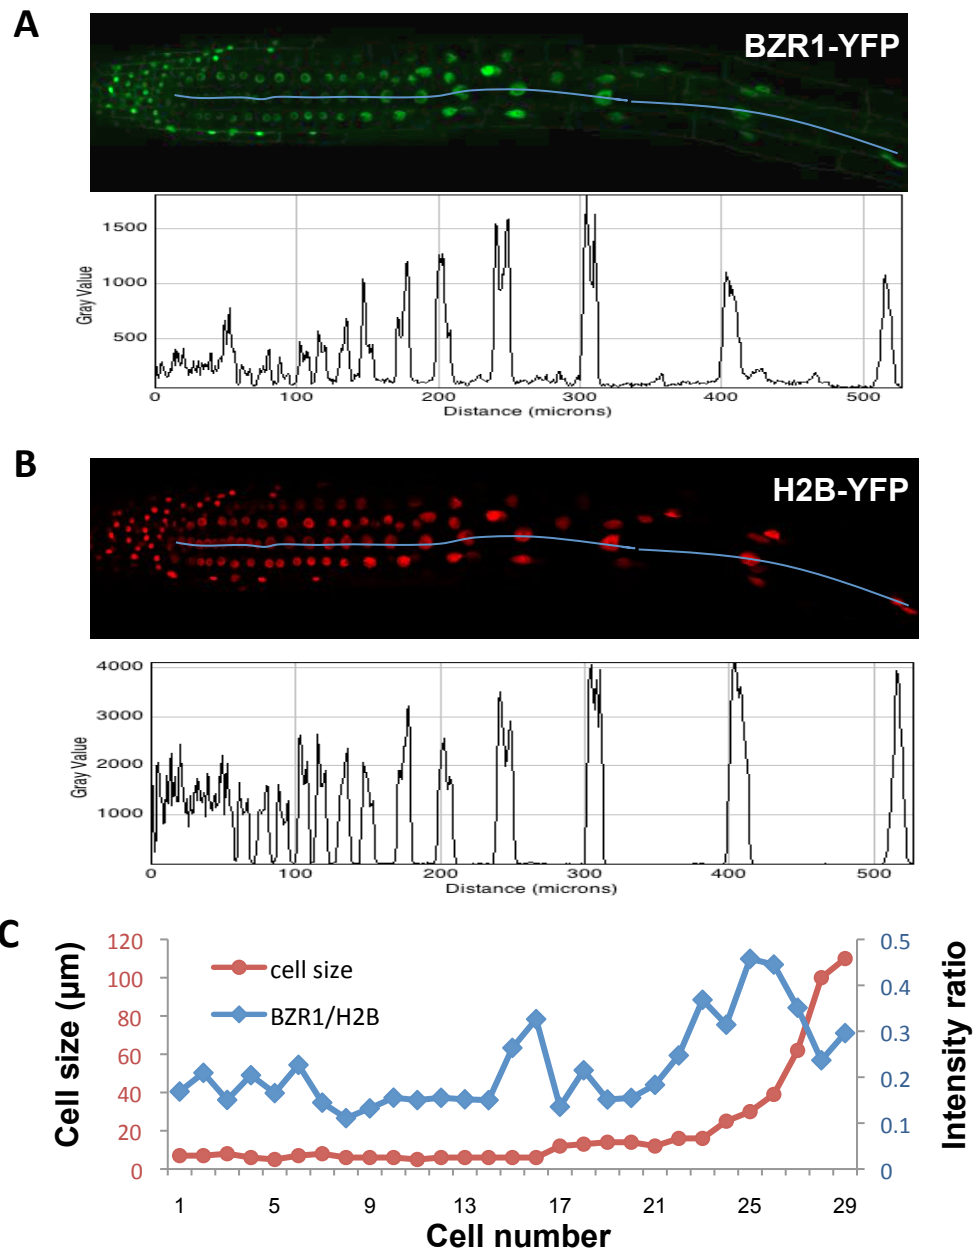

**Figure S2. Nuclear BZR1 is patterned in root tip.**

Confocal images of BZR1-YFP (A) and H2B-RFP (B) expressed in the same root. The YFP and RFP signal intensities were measured along the blue line and plotted in the graph below the images, using the Fiji software. (C) Quantitation of cell size and the ratio of BZR1-YFP to H2B-RFP signal intensities in the nuclei of the epidermal cells marked in panel A and B. Cells #15 and 16 are likely to have just finished division. See also Figure 2.

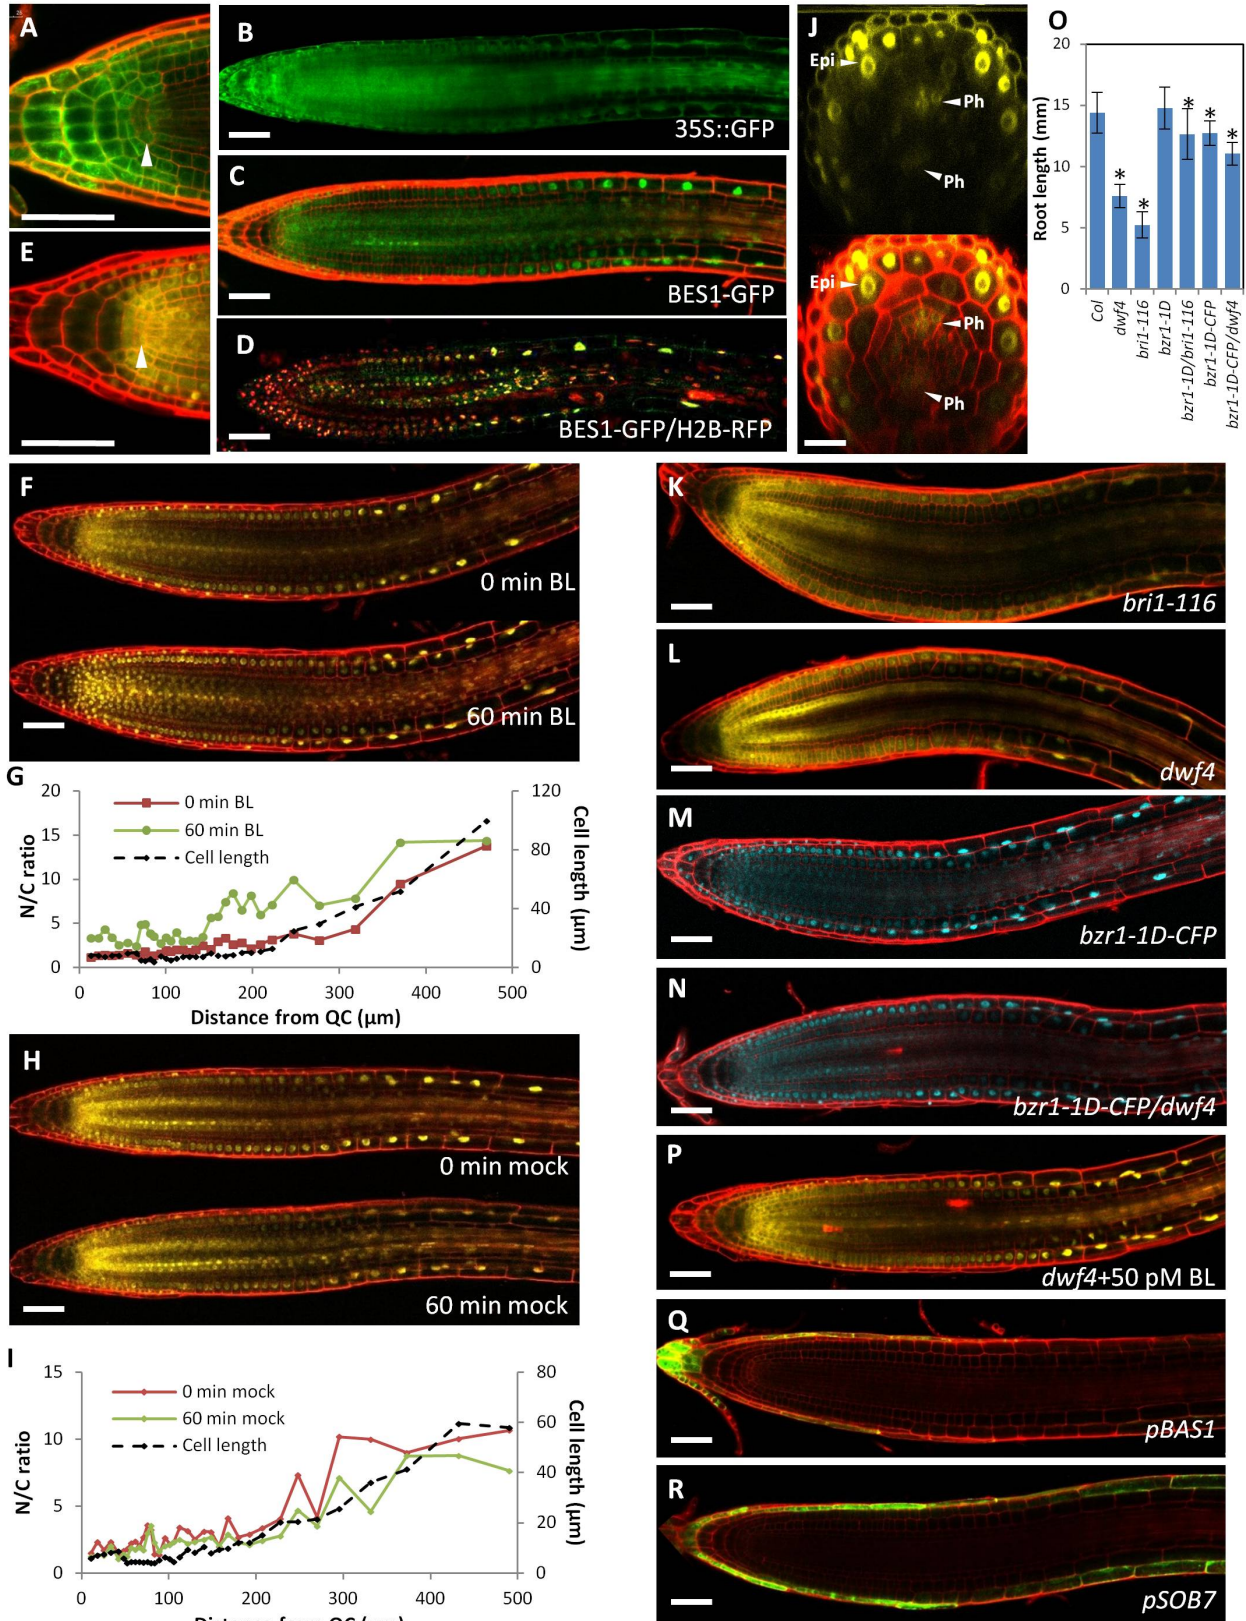

**Figure S3. Spatial patterning of BR signaling and BR catabolism in roots.**

**Figure S3. Spatial patterning of BR signaling and BR catabolism in roots.**

(A-B) Confocal images of root tips of *pBZR1:GFP* (A) and *35S:GFP* (B) transgenic plants. (C) *pBES1:BES1-GFP* root tip without treatment. (D) Overlay of confocal images of BES1-GFP (green) and H2B-RFP (red) expressed in the same root of a transgenic plant grown on regular medium. (E) Confocal image of a *pBZR1:BZR1-YFP* root tip. (F-I) Confocal images and quantification of nuclear to cytoplasmic (N/C) ratio and cell length in the epidermis along the root axis of *pBZR1:BZR1-YFP* root tips before and after 60 min treatment of BL (F-G) or mock (H-I). (J) Transverse section confocal images of the *pBZR1:BZR1-YFP* line showing accumulation of BZR1-YFP in the epidermis (Epi) and phloem (Ph). YFP channel (top), merged with propidium iodide stain (bottom). (K-L) BZR1-YFP protein is accumulated in the cytoplasm in the *bri1-116* and *dwf4* root tips. *pBZR1:BZR1-YFP/bri1-116* (K) and *pBZR1:BZR1-YFP/dwf4* (L) seedlings grown on regular medium. (M-N) *bzr1-1D-CFP* accumulates in nuclei of all cell types independently of endogenous BR biosynthesis. The *pBZR1:bzr1-1D-CFP* lines in the wild-type (M) or *dwf4* background (N) were grown on regular medium. (O) Root length of 6-day-old wild type Col-0 and indicated mutants (n>30, mean  $\pm$ SD); \*  $P < 0.001$ , as determined by a Student's t test. (P) *pBZR1:BZR1-YFP/dwf4* seedling grown on medium containing 50 pM BL. (Q-R) Expression of *pBAS1:GFP* (Q) and *pSOB7:GFP* (R) in the root tip region. Scale bars, 50  $\mu$ m. See also Figure 2.

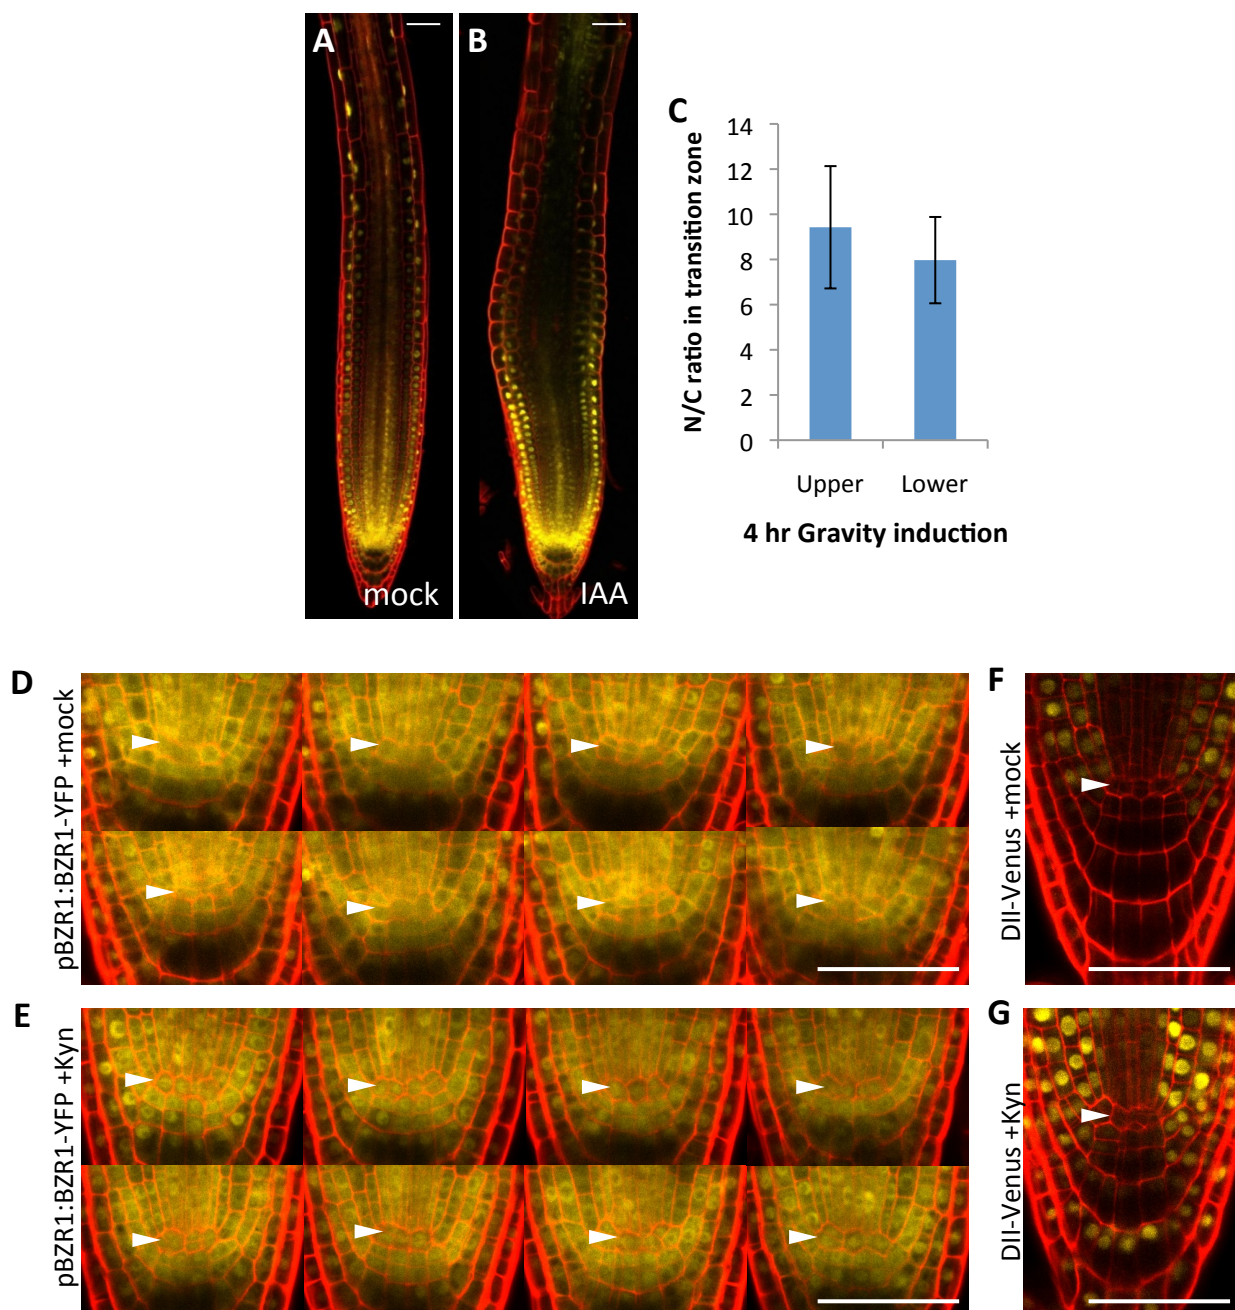

**Figure S4. Effects of altered auxin distribution on BZR1 localization pattern.**

(A-B) *pBZR1:BZR1-YFP* roots treated with mock (A) or 5  $\mu$ M IAA (B) for 24 hr. (C) N/C ratios of BZR1-YFP in the transition zone (epidermis) of the upper and lower sides of *pBZR1:BZR1-YFP* roots after 4 hr gravity induction (n = 4 roots, mean  $\pm$ SD). (D-E) Stem cell niche regions of *pBZR1:BZR1-YFP* roots treated with mock (D) or 25  $\mu$ M L-Kynurenine (Kyn) (E) for 24 hr, n = 8. (F-G) Root tips of the *DII-Venus* auxin reporter treated with mock (F) or 25  $\mu$ M Kyn (G) for 24 hr. Arrowheads indicate QC cell layer. Scale bars, 50  $\mu$ m. See also Figure 4.

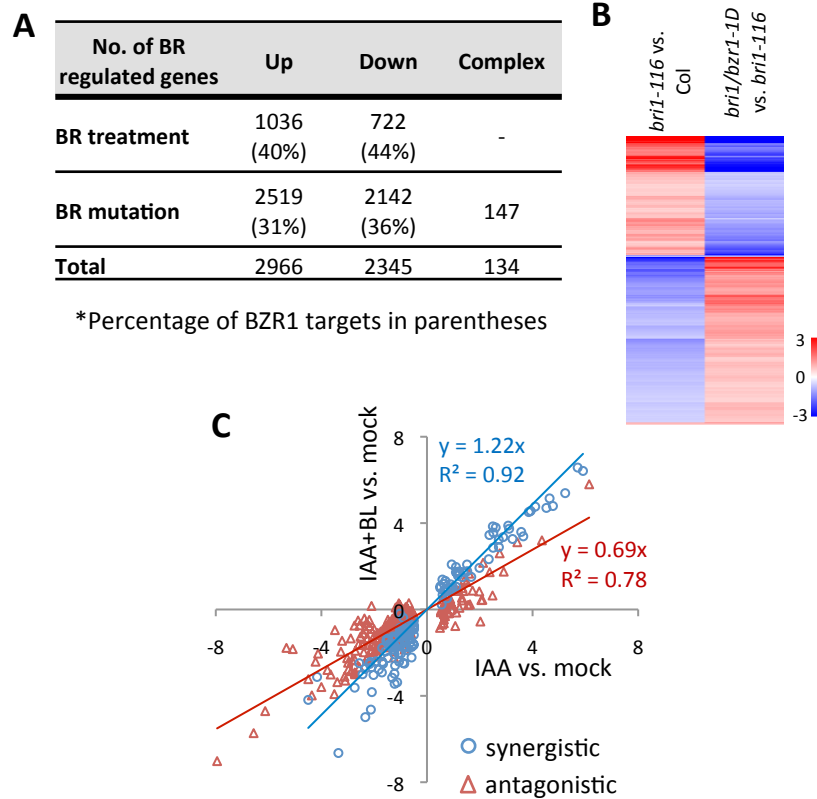

**Figure S5. BR and auxin regulate overlapping transcriptomes.**

(A) Table summarizing the number of genes induced (Up) or repressed (Down) by BR treatment (Col+BL vs. Col; *dwf4*+BL vs. *dwf4*) or BR mutation (Col vs. *dwf4*; Col vs. *bri1-116*; *bri1-116/bzi1-1D* vs. *bri1-116*) and the union of both sets (Total). ‘Complex’ indicates the number of genes respond to BR treatment or mutation in opposite manner. Percentages of BZR1 target genes are in parentheses. (B) Hierarchical cluster analysis of the genes affected by both *bri1-116* and *bzi1-1D*. The numerical values for the blue-to-red gradient bar represent  $\log_2$  fold change relative to the control sample. (C) Scatter plot showing  $\log_2$  fold change values of Col+IAA vs. Col and Col+IAA+BL vs. Col for genes affected by both IAA and BL single treatments in wild-type. See also Figure 5.

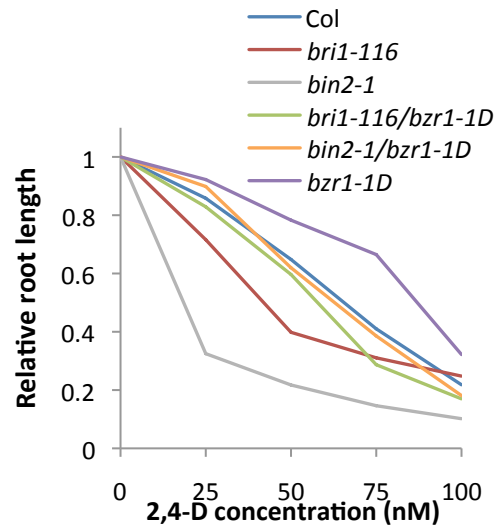

**Figure S6. *bzr1-1D* suppresses the auxin hypersensitivity in root growth of BR-signaling mutants.**

Relative root length of 6-day-old seedlings of indicated genotype grown on vertical media supplemented with various concentrations of 2,4-D. (n>30, mean  $\pm$ SD). See also Figure 7.

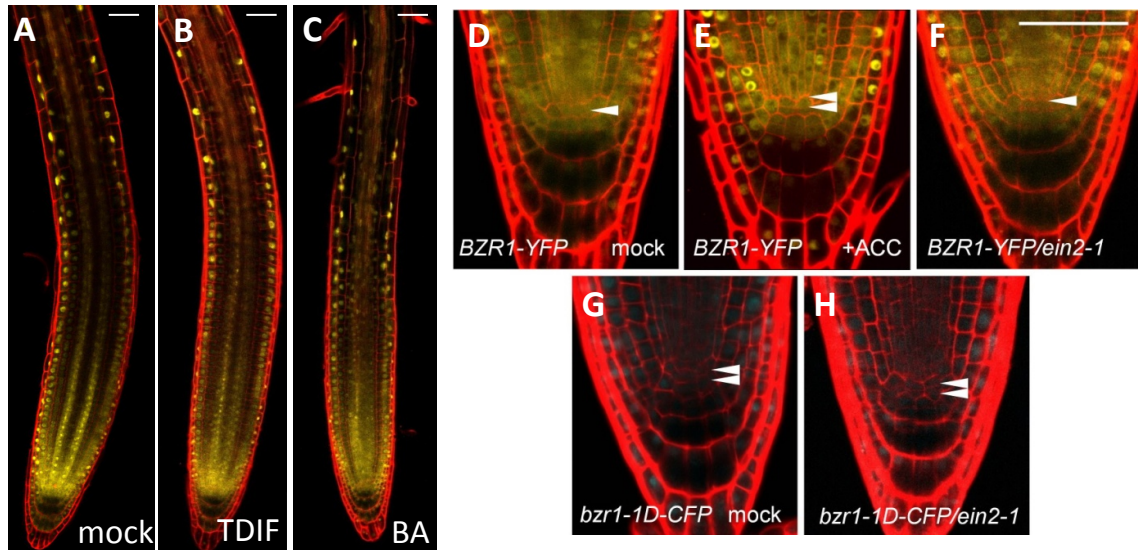

**Figure S7. Patterning of BZR1 is independent of other signals and BZR1 regulates QC renewal independently of ethylene signaling.**

*pBZR1:BZR1-YFP* roots treated with mock (A), 10  $\mu$ M Tracheary Element Differentiation Inhibitory Factor (TDIF) (B), or 5  $\mu$ M 6-benzylaminopurine (BA) (C) or for 24 hr. (D-E) Treatment of ethylene biosynthetic precursor ACC promotes QC division without promoting BZR1 nuclear accumulation in the QC. *pBZR1:BZR1-YFP* transgenic lines treated with mock (D) and 50  $\mu$ M ACC (E) for 24 hr. (F) The *ein2-1* mutation does not alter BZR1 pattern in the root tip. The *pBZR1:BZR1-YFP* line in *ein2-1* background was grown on regular medium.

(G-H) The *ein2-1* mutant expressing *bzr1-1D-CFP* exhibits two layers of QC cells, like *bzr1-1D-CFP*. *pBZR1:bzr1-1D-CFP* in wild-type (G) or *ein2-1* background (H). Arrowheads indicate QC cell layer. Scale bars, 50  $\mu$ m.



## Supplemental Tables

**Table S1.** RNA-Seq data of BR- and auxin-responsive genes in roots showing average expression ratios and the *P*-values between indicated pair-wise comparisons.

**Table S2.** Comparison of genes up- or down-regulated by BR or auxin, identified by RNA-Seq in roots (Table S1), to the BZR1 ChIP-chip and ChIP-Seq data [S1, S2], and the RootMap spatial gene expression data [S3]. QC, quiescent center; MZ, meristem zone; TEZ, transition-elongation zone; LEZ, late elongation zone; DZ, differentiation zone.

**Table S3. BR inhibits and auxin promotes ribosome biogenesis in meristem.** Table includes genes related to ribosome biogenesis or rRNA processing among the meristem-enriched genes that are repressed by BR and induced by auxin. \* indicates BZR1 target genes.

| Gene_ID    | Gene Name or Description                                                                                                      |
|------------|-------------------------------------------------------------------------------------------------------------------------------|
| AT2G47990  | SLOW WALKER1 (SWA1)                                                                                                           |
| AT1G48920  | NUCLEOLIN LIKE 1 (NUC-L1)                                                                                                     |
| AT5G55920* | OLIGOCELLULA 2 (OLI2)                                                                                                         |
| AT5G16750* | TORMOZEMBRYO DEFECTIVE (TOZ)                                                                                                  |
| AT4G25630* | FIBRILLARIN 2 (FIB2)                                                                                                          |
| AT3G55510* | REBELOTE (RBL)                                                                                                                |
| AT5G61770* | PETER PAN-like protein (PPAN)                                                                                                 |
| AT4G05410  | YAOZHE (YAO)                                                                                                                  |
| AT3G60360  | Embryo sac development arrest 14 (EDA14)                                                                                      |
| AT3G56990  | Embryo sac development arrest 7 (EDA7)                                                                                        |
| AT1G31660  | AtENP1/Putative bystin/protein co-factors of ribosome biogenesis                                                              |
| AT3G21540  | Transducin/WD40 repeat-like superfamily protein                                                                               |
| AT5G11240  | Transducin/WD40 repeat-like superfamily protein                                                                               |
| AT4G04940  | Transducin/WD40 repeat-like superfamily protein                                                                               |
| AT5G14050  | Transducin/WD40 repeat-like superfamily protein                                                                               |
| AT5G15550  | Transducin/WD40 repeat-like superfamily protein                                                                               |
| AT5G60990  | DEA(D/H)-box RNA helicase family protein                                                                                      |
| AT5G65900  | DEA(D/H)-box RNA helicase family protein                                                                                      |
| AT1G51380  | DEA(D/H)-box RNA helicase family protein                                                                                      |
| AT5G54910  | DEA(D/H)-box RNA helicase family protein                                                                                      |
| AT3G09720* | RNA Helicase 57 (RH57)                                                                                                        |
| AT2G28600  | RNA helicase/Yeast Dbp3p homolog/pre-rRNA processing/P-loop containing nucleoside triphosphate hydrolases superfamily protein |
| AT2G32220  | Ribosomal protein L27e family                                                                                                 |
| AT1G06380  | Ribosomal protein L1p/L10e family                                                                                             |
| AT3G58660  | Ribosomal protein L1p/L10e family                                                                                             |

| Gene_ID    | Gene Name or Description                                                                                    |
|------------|-------------------------------------------------------------------------------------------------------------|
| AT1G80750  | Ribosomal protein L30/L7 family                                                                             |
| AT5G39850  | Ribosomal protein S4                                                                                        |
| AT3G57490  | Ribosomal protein S5 family protein                                                                         |
| AT5G59240  | Ribosomal protein S8e family protein                                                                        |
| AT1G03360  | Ribosomal RNA processing 4 (RRP4)                                                                           |
| AT5G40530  | Ribosomal RNA-processing protein 8/S-adenosyl-L-methionine-dependent methyltransferases superfamily protein |
| AT1G52930  | Ribosomal RNA processing Brix domain protein                                                                |
| AT1G60620  | RNA polymerase I subunit 43 (RPAC43)                                                                        |
| AT1G75670  | DNA-dependent RNA polymerase I subunit RPA43                                                                |
| AT3G22660  | rRNA processing protein-related                                                                             |
| AT4G10620  | BPG2-like/P-loop containing nucleoside triphosphate hydrolases superfamily protein                          |
| AT4G34910  | P-loop containing nucleoside triphosphate hydrolases superfamily protein                                    |
| AT2G40430  | Gltscr2-homolog/nucleolar protein                                                                           |
| AT1G79150* | Nucleolar complex-associated protein 3                                                                      |
| AT1G63810  | Nucleolar RNA-associated protein/U3 snoRNA-associated protein complex/Nrap protein                          |
| AT4G25730  | FtsJ-like methyltransferase family protein                                                                  |
| AT1G15420  | Small-subunit processome, Utp12                                                                             |
| AT3G19440  | Pseudouridine synthase family protein                                                                       |
| AT1G15440  | Periodic tryptophan protein 2 (PWP2)                                                                        |
| AT3G07750* | 3'-5'-exoribonuclease family protein                                                                        |
| AT5G66540  | unknown protein                                                                                             |

**Table S4. Auxin regulates expression of genes involved in BR biosynthesis, BR catabolism and BR signaling pathway.**

Auxin-responsive genes (Table S1, S2) with known function in BR biosynthesis, catabolism, and signaling pathway.

\* Expression fold change from Col+IAA (5  $\mu$ M, 4 hr) vs. Col comparison. Red = auxin-induced genes; blue = auxin-repressed genes.

|                        | Gene name    | Gene ID   | BZR1target | BR   | Auxin*<br>(fold change,<br>$p < 0.01$ ) | QC | Zone |
|------------------------|--------------|-----------|------------|------|-----------------------------------------|----|------|
| <b>BR biosynthesis</b> | DWF4         | AT3G50660 | yes        | down | 2.60                                    | -  | -    |
|                        | CPD          | AT5G05690 | yes        | down | 0.64                                    | -  | -    |
|                        | BR6OX1       | AT5G38970 | yes        | up   | 0.26                                    | -  | TEZ  |
|                        | ROT3/CYP90C1 | AT4G36380 | yes        | no   | 0.62                                    | -  | TEZ  |
|                        | CYP90D1      | AT3G13730 | yes        | down | 0.62                                    | -  | -    |
| <b>BR catabolism</b>   | BAS1         | AT2G26710 | yes        | up   | 2.14                                    | -  | -    |
|                        | SOB7/SHK1    | AT1G17060 | yes        | up   | 4.57                                    | -  | TEZ  |
|                        | BEN1         | AT2G45400 | no         | up   | 3.73                                    | -  | TEZ  |
| <b>BR signaling</b>    | BRL1         | AT1G55610 | yes        | down | 4.11                                    | QC | -    |
|                        | BRL2         | AT2G01950 | no         | up   | 0.55                                    | -  | -    |
|                        | BRL3         | AT3G13380 | yes        | down | 6.74                                    | -  | -    |
|                        | BKI1         | AT5G42750 | no         | no   | 1.83                                    | -  | -    |

**Table S5. BR pathway regulates expression of genes involved in auxin homeostasis and signaling pathway.**

BR-regulated or BZR1 target genes with known function in auxin homeostasis and signaling pathway. Underlined = BZR1 target; red = BR-induced; blue = BR-repressed; black = non-BR-responsive; \* = complex BR regulation.

| AUX/IAA      | ARF              | Biosynthesis   | Conjugation   | Transport     |
|--------------|------------------|----------------|---------------|---------------|
| <u>IAA1</u>  | <u>ARF2</u> (-)  | <u>TAR2</u>    | <u>GH3.1</u>  | <u>PIN1</u>   |
| <u>IAA2</u>  | <u>ARF9</u> (-)  | <u>TAA1</u>    | <u>GH3.2</u>  | <u>PIN3</u>   |
| <u>IAA3</u>  | <u>ARF18</u> (-) | <u>YUC3</u>    | <u>GH3.3</u>  | <u>PIN5</u>   |
| <u>IAA11</u> | <u>ARF19</u> (+) | <u>YUC5</u>    | <u>GH3.5</u>  | <u>PIN2</u>   |
| <u>IAA12</u> | <u>ARF4</u> (-)  | <u>YUC9</u>    | <u>GH3.6</u>  | <u>PIN4</u>   |
| <u>IAA16</u> | <u>ARF10</u> (-) | <u>YUC2</u>    | <u>GH3.17</u> | <u>PIN6</u>   |
| <u>IAA17</u> | <u>ARF11</u> (-) | <u>YUC6</u> *  | <u>GH3.18</u> | <u>PIN7</u>   |
| <u>IAA18</u> | <u>ARF16</u> (-) | <u>YUC8</u> *  | <u>GH3.8</u>  | <u>ENP</u>    |
| <u>IAA19</u> | <u>ARF5</u> (+)  | <u>YUC4</u>    | <u>GH3.14</u> | <u>PID2</u>   |
| <u>IAA29</u> | <u>ARF8</u> (+)  | <u>TSA1</u>    | <u>GH3.15</u> | <u>PID</u> *  |
| <u>IAA10</u> | <u>ARF6</u> (+)  | <u>TSB1</u>    | <u>GH3.10</u> | <u>PBP1</u> * |
| <u>IAA13</u> | <u>ARF17</u> (-) | <u>TRP1</u>    | <u>GH3.11</u> | <u>ABCB1</u>  |
| <u>IAA14</u> |                  | <u>CYP79B2</u> |               | <u>ABCB4</u>  |
| <u>IAA33</u> | <b>Receptor</b>  | <u>CYP79B3</u> |               | <u>ABCB19</u> |
| <u>IAA26</u> | <u>TIR1</u>      | <u>ASA1</u>    |               | <u>AUX1</u>   |
| <u>IAA20</u> | <u>AFB2</u>      | <u>ASB1</u>    |               | <u>LAX1</u>   |
| <u>IAA27</u> |                  | <u>SUR1</u>    |               | <u>LAX2</u>   |
| <u>IAA30</u> |                  | <u>NIT1</u>    |               | <u>LAX3</u>   |
|              |                  | <u>NIT2</u>    |               | <u>WAG1</u>   |
|              |                  | <u>NIT3</u>    |               | <u>WAG2</u>   |
|              |                  |                |               | <u>WAT1</u>   |

## Supplemental Movie

**Movie S1:** A three-dimensional view of BZR1-YFP (green) and H2B-RFP (red) expressed from the 35S promoter in a root of transgenic plant grown on regular medium. Serial optical sections (Z-stack, 2 µm each) were processed using Fiji software package to render 3-D view. See also Figure 2B.

## Supplemental Experimental Procedures

### Plant growth and root imaging

All wild-type, various mutants and transgenic lines are in the *Arabidopsis thaliana* Columbia (Col-0) background. These include *dwf4* (Salk\_020761), *bri1-116* [S4], *bin2-1* [S5], *bzr1-1D* [S6], *bri1-116/bzr1-1D* [S7], *bin2-1/bzr1-1D*, *pBZR1:bzr1-1D-CFP* [S8], *bas1-2/sob7-1* [S9], *ein2-1* [S10], *pBZR1:BZR1-YFP* [S11], *pBRAVO:GFP* [S12]; *pPLT1:PLT1-YFP* and *pPLT2:PLT2-YFP* [S13], and *35S:H2B-RFP* [S14]. Seeds were surface sterilized for 15 min with 70% ethanol/0.05% Triton X-100 solution and plated on half-strength MS media pH 5.7, containing 1% sucrose and 0.8% Phytoblend agar. Seedlings were grown vertically on regular media, supplemented with hormones or mock under constant light. An auxin analog, 2,4-D, was used in auxin root inhibition assays because the natural auxin IAA is significantly degraded over long-term treatment [S15].

Root lengths were measured from images using ImageJ. For live-imaging analysis, seedlings were grown on regular media for 5 days and then transferred to new media supplemented with hormones or mock, and imaged every 15 min for 3 days using a custom macroscopic imaging system as previously described [S16]. Sequential images were aligned and stacked using ImageJ. Quantification of root growth was performed using a macro in ImageJ as previously described [S17].

### Confocal microscopy and quantification of fluorescence signal

Laser scanning confocal microscopy was performed by using a Leica SP5 system after propidium iodide staining. At least 5 roots were analyzed for each treatment in each experiment and each experiment was repeated independently at least 3 times. The same laser settings were

used within the same experiment. To determine N/C ratios of BZR1-YFP, BES1-GFP and *bzr1-1D-CFP*, the transgenic lines were crossed with plants expressing a nuclear marker *35S:H2B-RFP*, and serial optical sections were obtained from roots of F1 seedlings. Mean fluorescence intensities of nuclear and cytoplasmic areas of each epidermal cell along the root axis and QC cells were measured from the optical section that passed through the center of the nucleus of each cell using Fiji (<http://fiji.sc/wiki/index.php/Fiji>). For comparison of nuclear and cytoplasmic BZR1-YFP signals before and after BL treatment, mean fluorescence intensities were measured from the same corresponding cells. Quantification of BZR1-YFP in QC cells of the *bas1/sob7* mutants were performed with confocal images that passed through the center of QC's nuclei. For gravity-induction experiments, vertically grown BZR1-YFP seedlings were mounted on slides and maintained in horizontal position to stimulate gravitropism for 4 hr. The root epidermis was then imaged from both upper and lower sides of the roots. Nuclear and cytoplasmic BZR1-YFP signals were measured from five epidermal cells in the transition zone from each side of the roots. The average N/C ratio was then calculated from measurements of four roots.

### **Plasmid construction and transformation**

To generate the *pWOX5:bzr1-1D-YFP*, *pSCR:bzr1-1D-YFP*, and *pWER:bzr1-1D-YFP* constructs, the coding sequence of *bzr1-1D-YFP* was cloned from cDNA into the GATEWAY entry vector pENTRY/SD/D-TOPO (Invitrogen). The *WOX5* promoter region was cloned from genomic DNA into pDONR-P4P1R. Constructs with 2.5 kb 5' fragment and 1.1 kb 3' fragment of *WER*, as well as 2 kb 5' fragment of *SCR* are gift from J. Dinneny. The multisite gateway recombination was used to introduce the promoter fragment, the coding sequence and 3' fragment into a dpGreen-based binary vector with mCherry selection marker for plant selection [S16]. To generate the *pBES1:BES1-GFP* construct, *BES1* promoter and coding sequence was

cloned into the GATEWAY entry vector and recombined into the destination vector pGWB4. To generate the *BZR1*, *BAS1*, and *SOB7* promoter reporter constructs, the 1.0 kb, 2.9 kb, and 2.3 kb upstream regions of *BZR1*, *BAS1*, and *SOB7*, respectively, were amplified from Col-0 genomic DNA. The promoter fragments and the GFP reporter were then assembled into pGoldenGate-SE7 destination vector as previously described [S18]. The constructs were transformed into *Arabidopsis* via *Agrobacterium tumefaciens* GV3101. All primers used for cloning are listed in the following table.

***Primers used for cloning in this study***

| Name       | Sequence                                             |
|------------|------------------------------------------------------|
| WOX5pro-F  | GGGGACAACCTTTGTATAGAAAAGTTGCGAGAACCTCGGGGATGAAGAC    |
| WOX5pro-R  | GGGGACTGCTTTTTGTACAACTTGCGTTCAGATGTAAAGTCCTCAACTGTTT |
| BZR1pro-F  | CACCGGTCTCAAGTAGCCTAATTCATCGAACCCCTCT                |
| BZR1pro-R  | TTTGGTCTCATCATCGGGAAAACCAACAACCAA                    |
| BAS1pro-F  | CACCGGTCTCAAGTAGTATATCATGTATACTTAT                   |
| BAS1pro -R | TTTGGTCTCATCATTTGAGTGCCGGAGAAAGA                     |
| SOB7pro -F | CACCGGTCTCAAGTAGACTGCAAATCGCCGACGT                   |
| SOB7pro -R | TTTGGTCTCATCATCTTGATCTAGCTATGAAGA                    |
| BES1pro -F | CACCAAGTTGTCACTAAGATCGG                              |
| BES1-R     | ACTATGAGCTTTACCATTCCAAG                              |

**Total RNA extraction and quantitative RT-PCR analysis**

Seedlings were grown vertically on regular media in constant light for 7 days and treated with 100 nM BL, 5  $\mu$ M IAA, 100 nM BL+5  $\mu$ M IAA or ethanol (mock) solution for 4 hr. Roots were sectioned in the middle and the root tip half was harvested for total RNA extraction using the Spectrum Plant Total RNA kit (Sigma). For quantitative RT-PCR (qRT-PCR), the total RNA was used to prepare the first-strand cDNA using RevertAid reverse transcriptase (Fermentas).

Quantitative RT-PCR was performed on LightCycler 480 (Roche) using a SYBR Green reagent (Bioline). Three biological replicates were used in the analysis. All primers used in qRT-PCR analysis are listed in the following table.

***Primers used in qRT-PCR analysis***

| <b>Name</b> | <b>Sequence of qRT-PCR primers</b> |
|-------------|------------------------------------|
| EXPA8-qF    | TCCTCCTCTTCAGCATTTCGACCT           |
| EXPA8-qR    | CTTGCCACGACTGTGTTTTGAGC            |
| ACS5-qF     | GCGATGCTTTCCTTTGCCTACTC            |
| ACS5-qR     | TTTCTGGGCTTGTTGGTAAGCTTGT          |
| ACS11-qF    | GCTGAAAACCAGCTTTCTTTTG             |
| ACS11-qR    | TTTGTCTCTCTGATTTCCC                |
| DWF4-qF     | CATAAAGCTCTTCAGTCACGA              |
| DWF4-qR     | CGTCTGTTCTTTGTTTCCTAA              |
| IAA19-qF    | GGTGACAACGCGAATACGTTACCA           |
| IAA19-qR    | CCCGGTAGCATCCGATCTTTCA             |

**RNA-Seq**

The mRNA sequencing libraries were constructed with barcodes using the TruSeq RNA Sample Preparation kit (Illumina) according to manufacturer's instructions. The libraries were pooled and sequenced by Illumina HiSeq2000 with two biological replicates for each condition. The 36-bp sequence reads of *dwf4*, *dwf4*+BL and wild-type and the 101-bp sequence reads of Col, Col+BL, Col+IAA, Col+IAA+BL, *bri1-116*, *bri1-116/bzr1-1D* were aligned to the *Arabidopsis* genome, TAIR10, using TopHat software [S19]. Read counts for each gene were quantified using HTSeq-count with union mode. Differential expression was determined using DESeq [S20] with fold change > 1.4 (equivalent to log<sub>2</sub> fold change > 0.5), *P* < 0.01. Enrichment analysis was performed using the DAVID Functional Annotation tool [S21] for both GO



categories and InterPro protein families. Heatmaps of *P*-values were generated by matrix2png [S22]. Expression data were clustered or sorted and visualized with the TIGR MeV program [S23].

## Supplemental References

- S1. Oh, E., Zhu, J.-Y., Bai, M.-Y., Arenhart, R. a, Sun, Y., and Wang, Z.-Y. (2014). Cell elongation is regulated through a central circuit of interacting transcription factors in the *Arabidopsis* hypocotyl. *Elife*, e03031.
- S2. Sun, Y., Fan, X.-Y., Cao, D.-M., Tang, W., He, K., Zhu, J.-Y., He, J.-X., Bai, M.-Y., Zhu, S., Oh, E., et al. (2010). Integration of brassinosteroid signal transduction with the transcription network for plant growth regulation in *Arabidopsis*. *Dev. Cell* *19*, 765–77.
- S3. Brady, S. M., Orlando, D. a, Lee, J.-Y., Wang, J. Y., Koch, J., Dinneny, J. R., Mace, D., Ohler, U., and Benfey, P. N. (2007). A high-resolution root spatiotemporal map reveals dominant expression patterns. *Science* *318*, 801–6.
- S4. Friedrichsen, D. M., Joazeiro, C. a, Li, J., Hunter, T., and Chory, J. (2000). Brassinosteroid-insensitive-1 is a ubiquitously expressed leucine-rich repeat receptor serine/threonine kinase. *Plant Physiol.* *123*, 1247–56.
- S5. Li, J., Nam, K. H., Vafeados, D., and Chory, J. (2001). BIN2, a new brassinosteroid-insensitive locus in *Arabidopsis*. *Plant Physiol.* *127*, 14–22.
- S6. Wang, Z. Y., Nakano, T., Gendron, J., He, J., Chen, M., Vafeados, D., Yang, Y., Fujioka, S., Yoshida, S., Asami, T., et al. (2002). Nuclear-localized BZR1 mediates brassinosteroid-induced growth and feedback suppression of brassinosteroid biosynthesis. *Dev. Cell* *2*, 505–13.
- S7. Gendron, J. M., Haque, A., Gendron, N., Chang, T., Asami, T., and Wang, Z.-Y. (2008). Chemical genetic dissection of brassinosteroid-ethylene interaction. *Mol. Plant* *1*, 368–79.
- S8. He, J.-X., Gendron, J. M., Yang, Y., Li, J., and Wang, Z.-Y. (2002). The GSK3-like kinase BIN2 phosphorylates and destabilizes BZR1, a positive regulator of the brassinosteroid signaling pathway in *Arabidopsis*. *Proc. Natl. Acad. Sci. U. S. A.* *99*, 10185–90.
- S9. Turk, E. M., Fujioka, S., Seto, H., Shimada, Y., Takatsuto, S., Yoshida, S., Wang, H., Torres, Q. I., Ward, J. M., Murthy, G., et al. (2005). BAS1 and SOB7 act redundantly to modulate *Arabidopsis* photomorphogenesis via unique brassinosteroid inactivation mechanisms. *Plant J.* *42*, 23–34.

- S10. Guzman, P., and Ecker, J. (1990). Exploiting the triple response of Arabidopsis to identify ethylene-related mutants. *Plant Cell* 2, 513–523.
- S11. Gendron, J. M., Liu, J.-S., Fan, M., Bai, M.-Y., Wenkel, S., Springer, P. S., Barton, M. K., and Wang, Z.-Y. (2012). Brassinosteroids regulate organ boundary formation in the shoot apical meristem of Arabidopsis. *Proc. Natl. Acad. Sci. U. S. A.* 109, 21152–21157.
- S12. Vilarrasa-Blasi, J., González-García, M.-P., Frigola, D., Fàbregas, N., Alexiou, K. G., López-Bigas, N., Rivas, S., Jauneau, A., Lohmann, J. U., Benfey, P. N., et al. (2014). Regulation of Plant Stem Cell Quiescence by a Brassinosteroid Signaling Module. *Dev. Cell*, 1–12.
- S13. Galinha, C., Hofhuis, H., Luijten, M., Willemsen, V., Blilou, I., Heidstra, R., and Scheres, B. (2007). PLETHORA proteins as dose-dependent master regulators of Arabidopsis root development. *Nature* 449, 1053–7.
- S14. Federici, F., Dupuy, L., Laplace, L., Heisler, M., and Haseloff, J. (2012). Integrated genetic and computation methods for in planta cytometry. *Nat. Methods* 9, 483–5.
- S15. Dunlap, J. R., Kresovich, S., and McGee, R. E. (1986). The effect of salt concentration on auxin stability in culture media. *Plant Physiol.* 81, 934–6.
- S16. Duan, L., Dietrich, D., Ng, C. H., Chan, P. M. Y., Bhalerao, R., Bennett, M. J., and Dinneny, J. R. (2013). Endodermal ABA signaling promotes lateral root quiescence during salt stress in Arabidopsis seedlings. *Plant Cell* 25, 324–41.
- S17. Geng, Y., Wu, R., Wee, C. W., Xie, F., Wei, X., Chan, P. M. Y., Tham, C., Duan, L., and Dinneny, J. R. (2013). A Spatio-Temporal Understanding of Growth Regulation during the Salt Stress Response in Arabidopsis. *Plant Cell* 25, 2132–54.
- S18. Emami, S., Yee, M.-C., and Dinneny, J. R. (2013). A robust family of Golden Gate Agrobacterium vectors for plant synthetic biology. *Front. Plant Sci.* 4, 339.
- S19. Trapnell, C., Pachter, L., and Salzberg, S. L. (2009). TopHat: discovering splice junctions with RNA-Seq. *Bioinformatics* 25, 1105–11.
- S20. Anders, S., and Huber, W. (2010). Differential expression analysis for sequence count data. *Genome Biol.* 11, R106.
- S21. Huang, D. W., Sherman, B. T., Tan, Q., Collins, J. R., Alvord, W. G., Roayaei, J., Stephens, R., Baseler, M. W., Lane, H. C., and Lempicki, R. A. (2007). The DAVID Gene Functional Classification Tool: a novel biological module-centric algorithm to functionally analyze large gene lists. *Genome Biol.* 8, R183.
- S22. Pavlidis, P., and Noble, W. (2003). Matrix2png: a utility for visualizing matrix data. *Bioinformatics* 19, 295–296.

- S23. Saeed, A., Sharov, V., White, J., and Li, J. (2003). TM4: a free, open-source system for microarray data management and analysis. *Biotechniques* 34, 374–378.
